# Supplementary material for: Reducing noise current in exfoliated WS2 nanosheets using an ultra-nanocrystalline diamond substrate and their enhanced NIR photodetection properties
Source: Royal Society of Chemistry journal article supplement (doi:10.1039/d2tc00127f), 2022-01-01
Supplement: d2tc00127f1.pdf [file d2tc00127f1.pdf]

## Supporting Information

### **Reducing Noise Current in Exfoliated WS<sub>2</sub> Nanosheets using Ultrananocrystalline Diamond Substrate and Their Enhanced NIR Photodetection Properties**

Bohr-Ran Huang<sup>†#</sup>, Deepa Kathiravan<sup>†#</sup>, Adhimoorthy Saravanan<sup>†#</sup>, Erh-Wen Sung<sup>†</sup>

<sup>†</sup>*Graduate Institute of Electro-Optical Engineering and Department of Electronic and Computer Engineering, National Taiwan University of Science and Technology, Taipei 106, Taiwan, R.O.C.*

<sup>#</sup>*Taiwan Building Technology Center, National Taiwan University of Science and Technology, Taipei-106.*

\*To whom correspondence should be addressed. Email: [huangbr@mail.ntust.edu.tw](mailto:huangbr@mail.ntust.edu.tw)

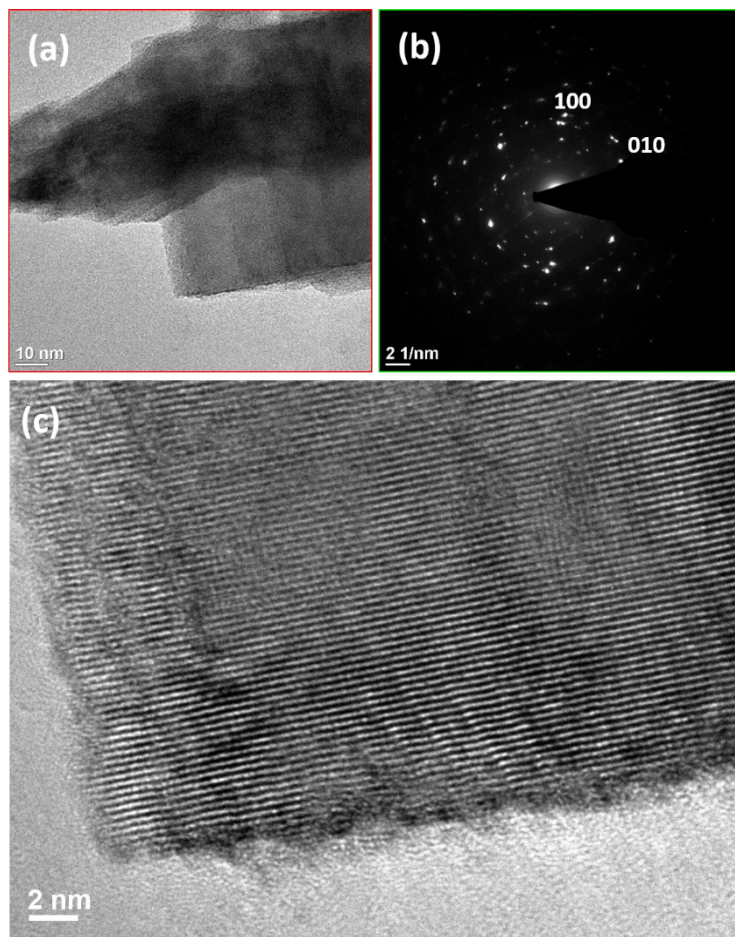

Fig. S1 HRTEM and SAED pattern of WS<sub>2</sub> nanosheets

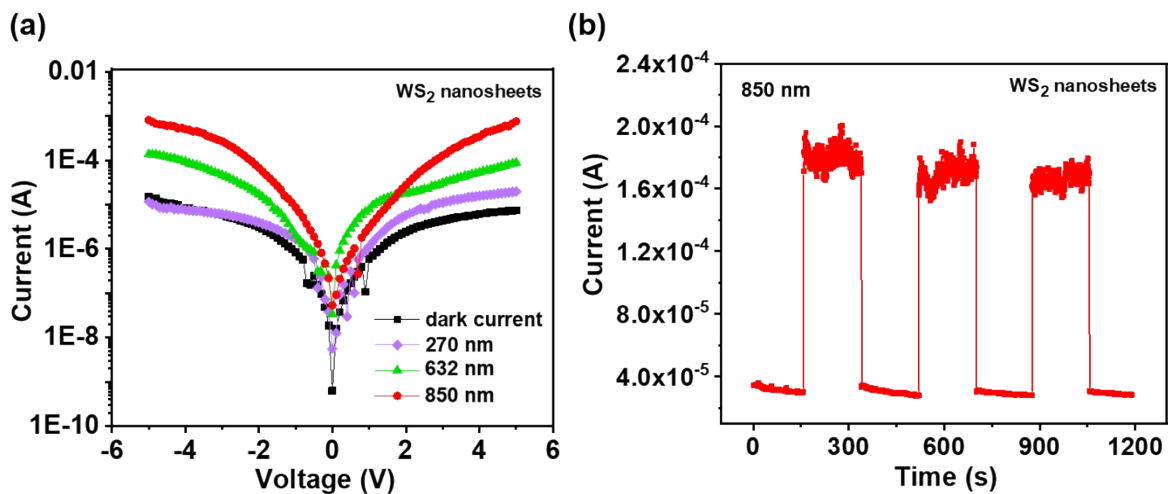

Fig. S2 Photodetection properties of WS<sub>2</sub> nanosheets

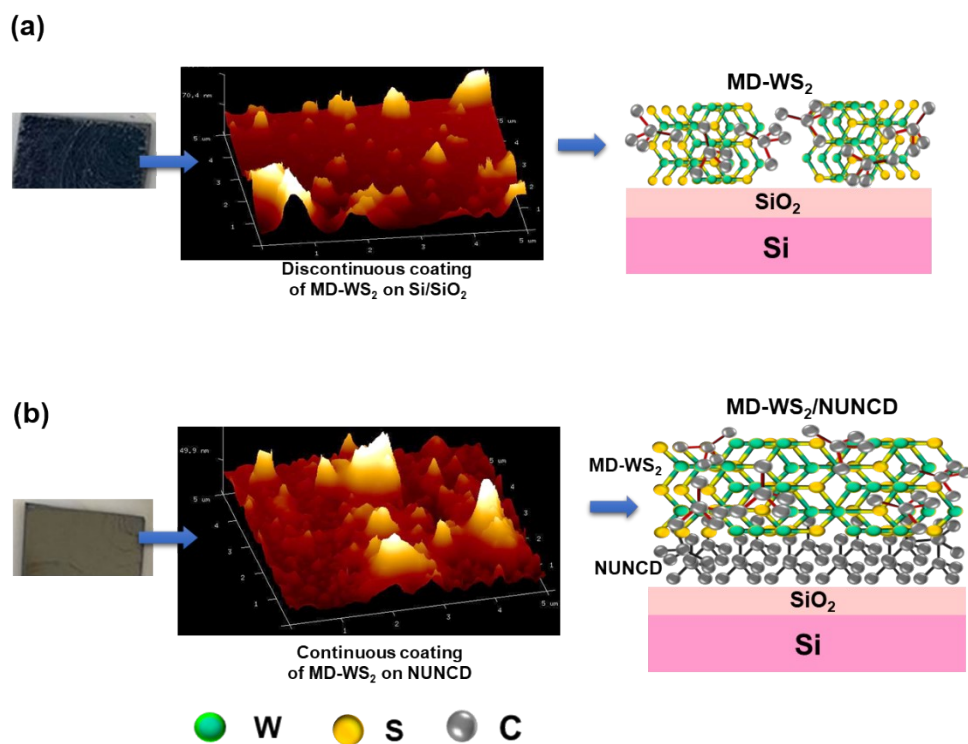

Fig.S3 AFM image and photo-image with the schematic illustration of MD-WS<sub>2</sub> nanosheets coated on (a) Si/SiO<sub>2</sub> substrate and (b) NUNCD substrate.

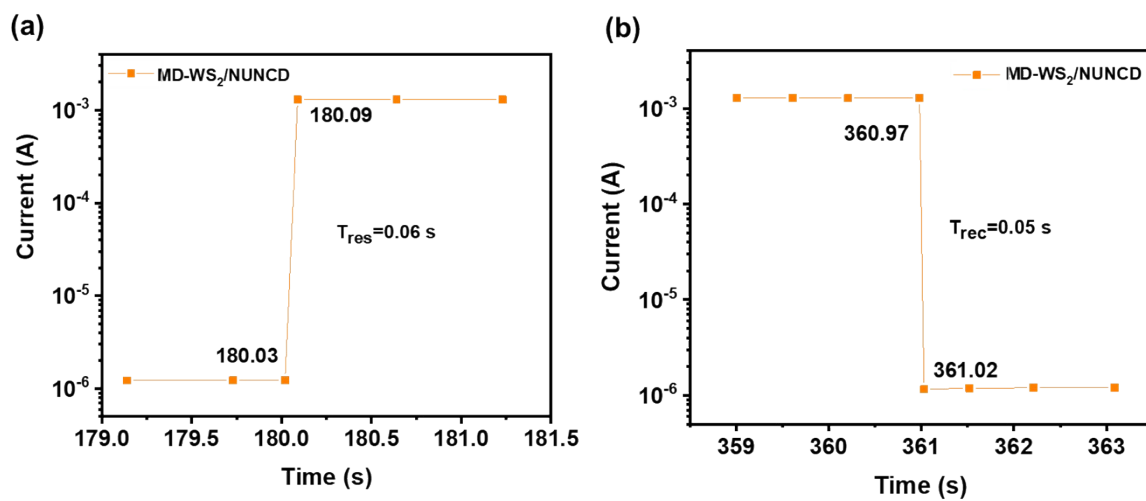

Fig. S4 I-T characteristics (a) Response and (b) Recovery times of MD-WS<sub>2</sub>/NUNCD
